# Supplementary material for: Tailoring the structural and electro-optical properties of avisible-light emitting BaZrO3 photocatalyst: integrating DFT and comprehensive experimental analysis
Source: Royal Society of Chemistry journal article supplement (doi:10.1039/d4nr00517a), 2024-01-01
Supplement: d4nr00517a1.pdf [file d4nr00517a1.pdf]

## Supplementary Information

### Tailoring the Structural and Electro-Optical Properties of Visible-Light Emitting BaZrO<sub>3</sub> Photo-catalyst: Integrating DFT and Comprehensive Experimental Analysis

Shubha Dubey<sup>1,\*</sup>, Vipin Kumar<sup>2,3,#</sup>, Kumud Dubey<sup>1</sup>, Chinmay Sahu<sup>1</sup>, Anchit Modi<sup>4</sup>, U. K. Gautam<sup>5</sup>, R. K. Sharma<sup>5</sup>, Fozia Z. Haque<sup>6</sup>, Gitanjali Pagare<sup>7</sup>, and N. K. Gaur<sup>1</sup>

<sup>1</sup>Department of Physics, Barkatullah University, Bhopal, 462 026, India

<sup>2</sup>Department of Physical Electronics, School of Electrical Engineering, Tel Aviv University, Tel Aviv 699 780, Israel

<sup>3</sup>The Sackler Center for Computational Molecular and Materials Science, Tel Aviv University, Tel Aviv 699 780, Israel

<sup>4</sup>Department of Basic Sciences, IITM, IES University, Bhopal, 462 044, India

<sup>5</sup>Technical Physics Division, Bhabha Atomic Research Centre, Mumbai, 400 085, India

<sup>6</sup>Department of Physics, Maulana Azad National Institute of Technology, Bhopal, 462 003, India

<sup>7</sup>Department of Physics, Sarojini Naidu Govt. Girls PG Autonomous College, Bhopal, 462016, India

Corresponding author- [\\*shubha.dubey4@gmail.com](mailto:shubha.dubey4@gmail.com)  
[#vipinkumar@mail.tau.ac.il](mailto:vipinkumar@mail.tau.ac.il)

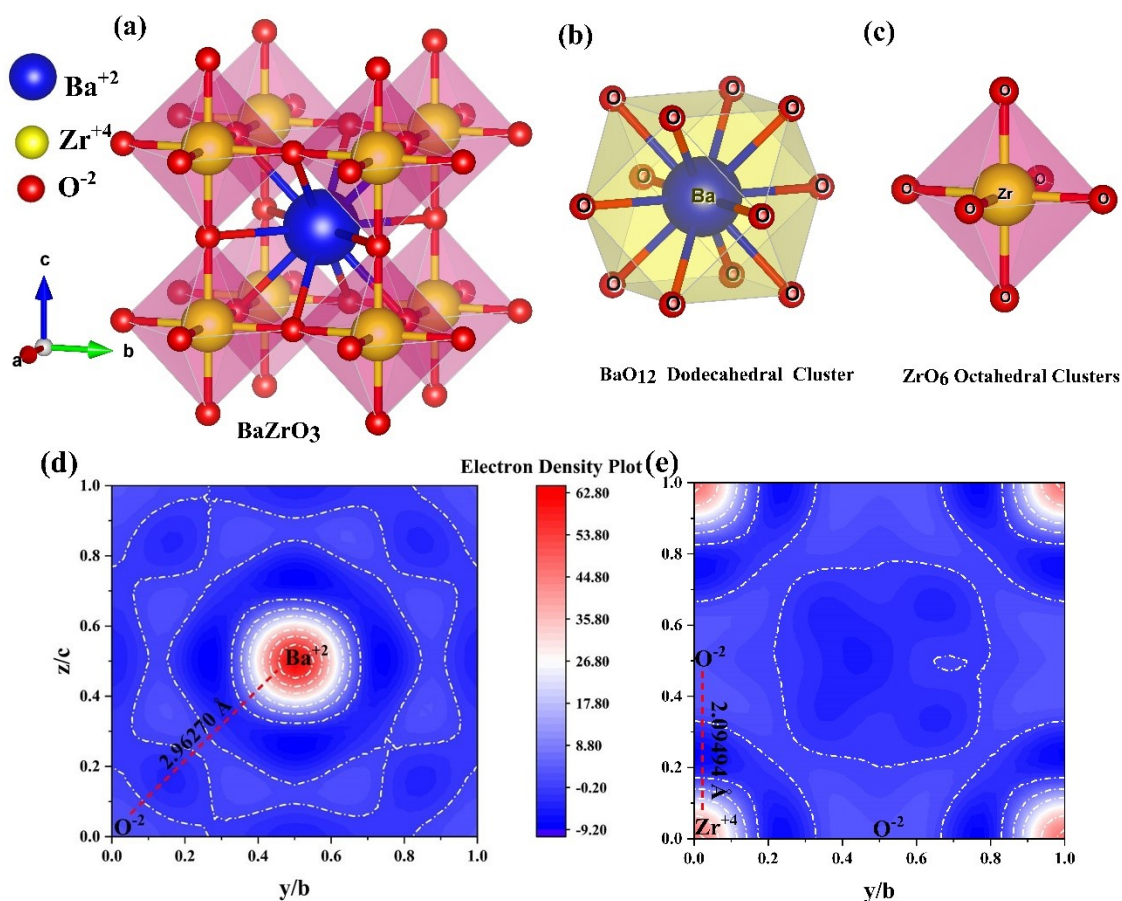

**Figure S1(a).** Crystallographic representation of BaZrO<sub>3</sub> Nanoparticles, **S1(b)** BaO<sub>12</sub> dodecahedral cluster, **S1(c)** ZrO<sub>6</sub> octahedral clusters and **S1(d-e)** Electron density plots of BaZrO<sub>3</sub>

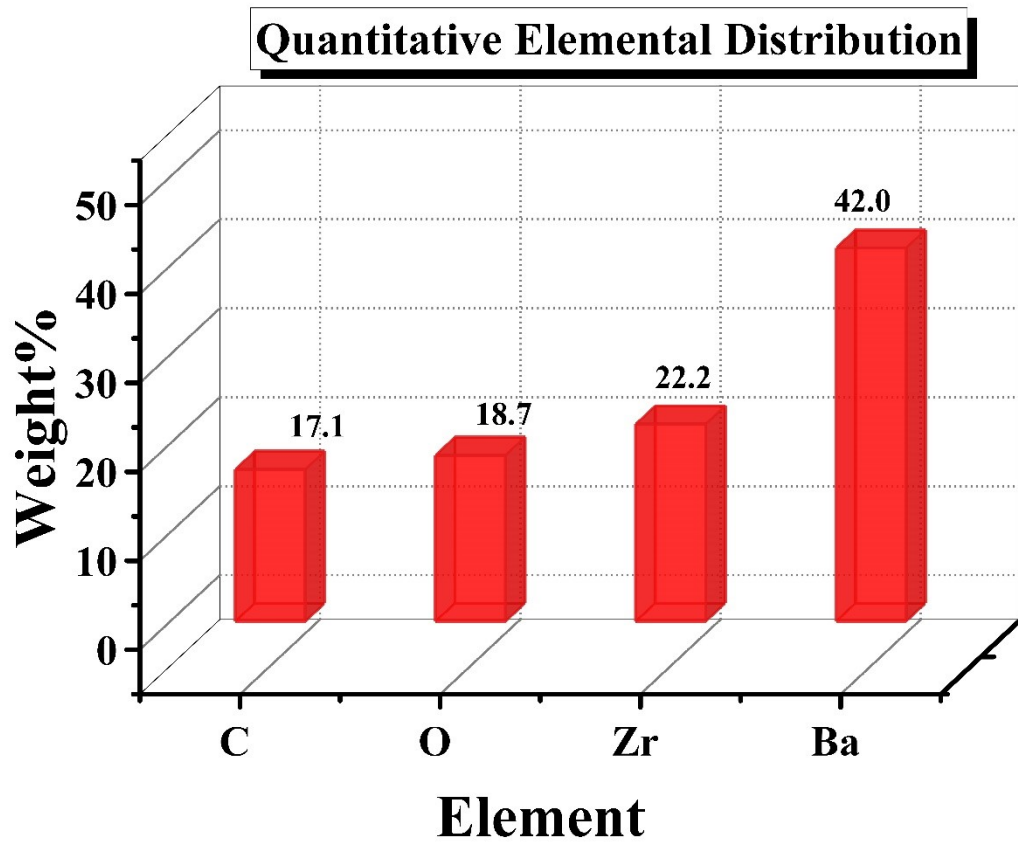

Figure S2. elemental distribution graph of BaZrO<sub>3</sub> nanoparticles.

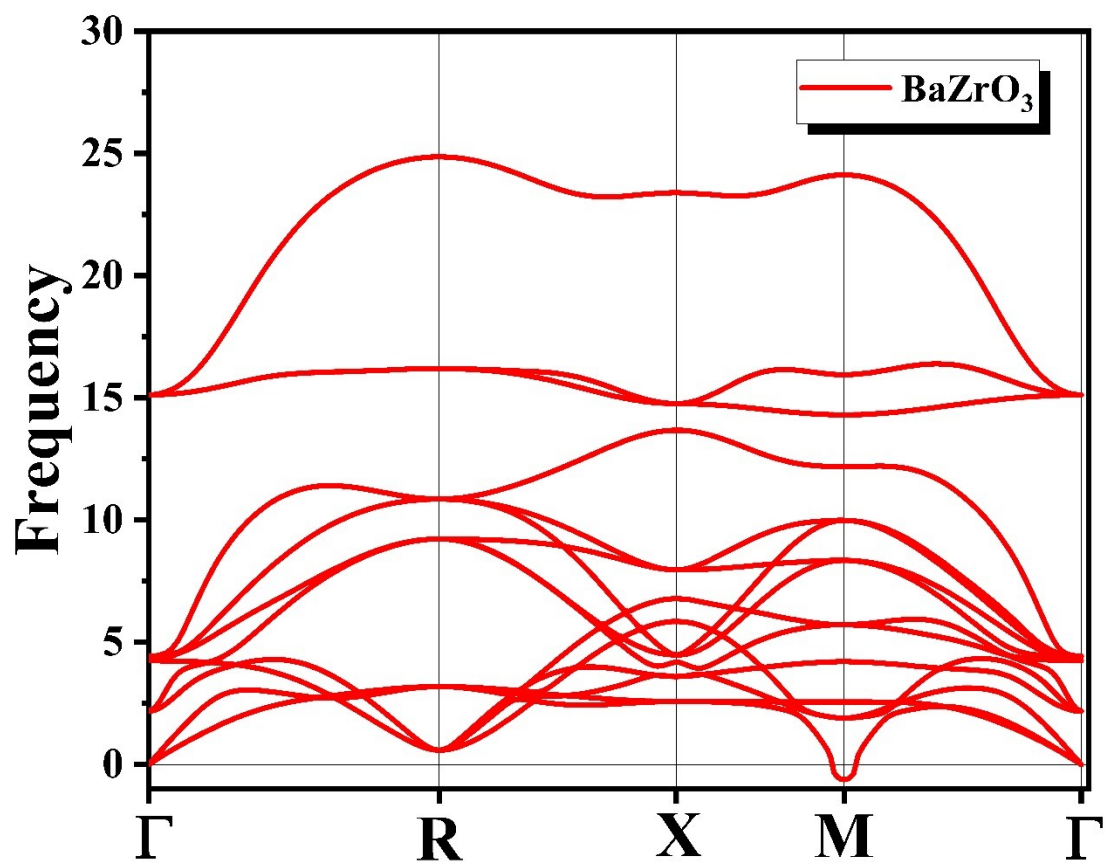

Figure S3. Phonon Spectra of BaZrO<sub>3</sub> nanoparticles.

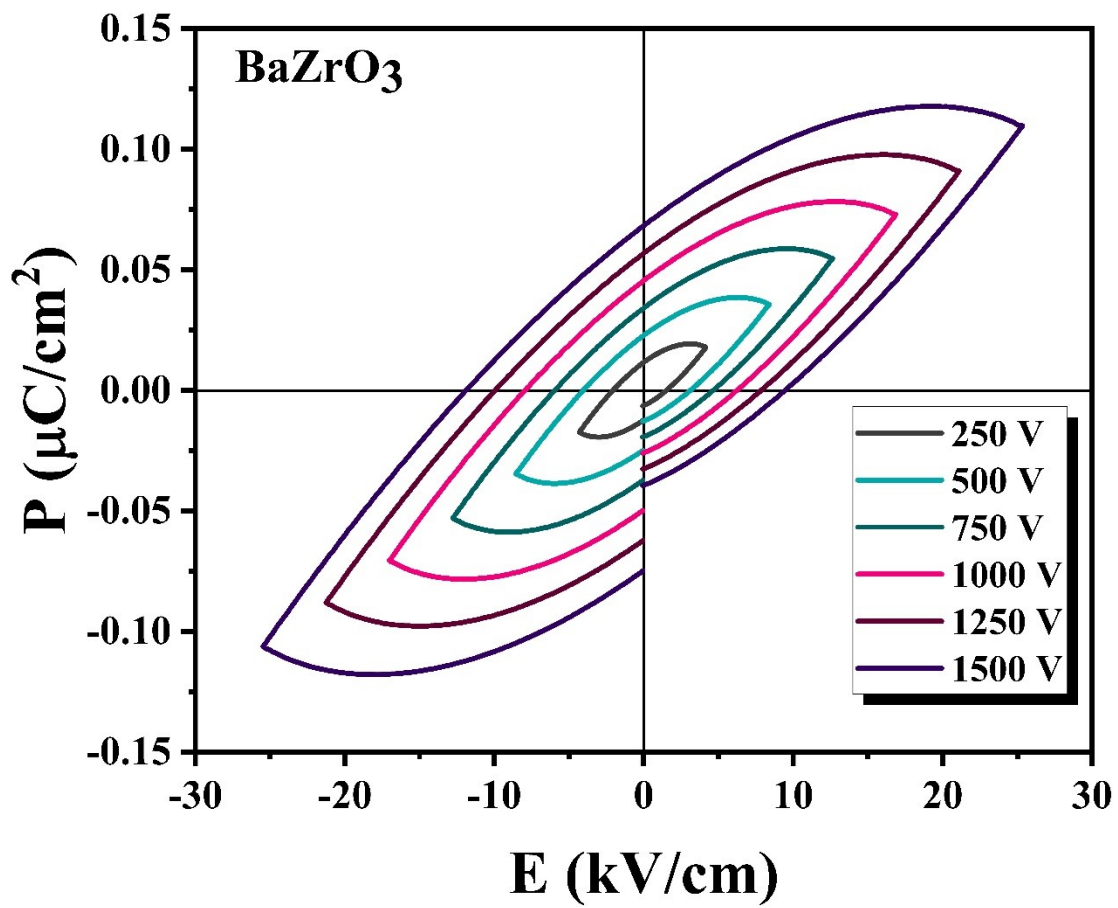

Figure S4. Ferroelectric PE Loop Analysis of BaZrO<sub>3</sub> ceramic.

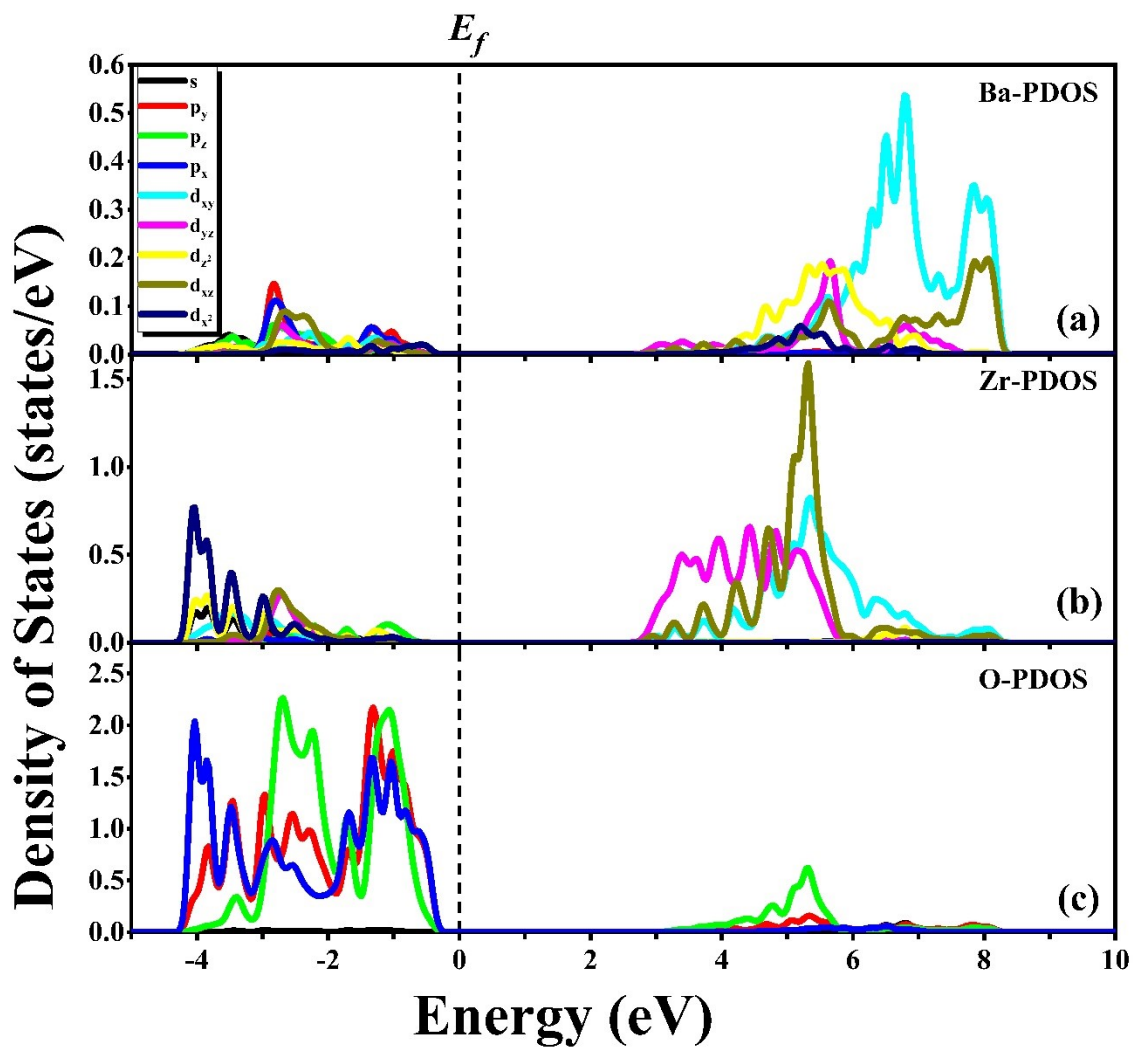

Figure S5. Partial Density of States (PDOS) of BaZrO<sub>3</sub>.
